# Supplementary material for: Detecting Early-stage Muscle Fatigue to Improve Assist-as-Needed Control Strategies for Active Orthoses
Source: Research Square preprint supplement (doi:10.21203/rs.3.rs-6236620/v1), 2025-03-31

# Supplementary material

## EMG Svar across all participants

(a) 20% MVC - Fitting a gaussian function to the normalised PSD variance/perceived fatigue data

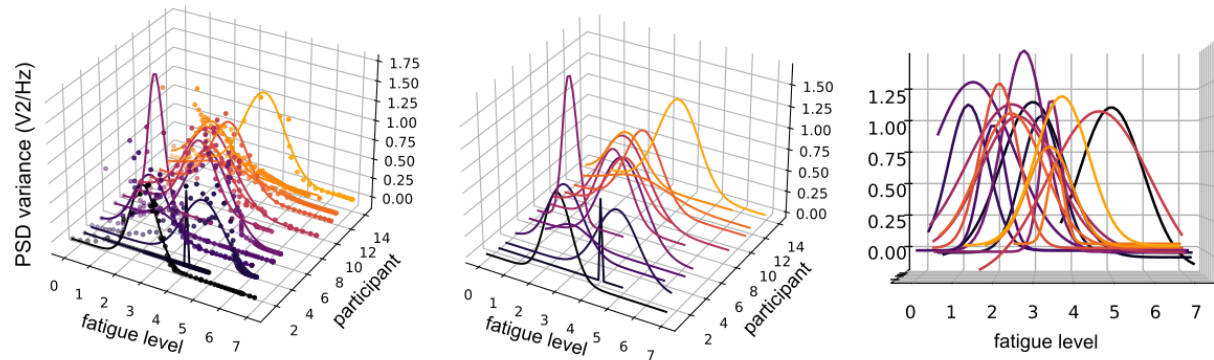

(b) 50% MVC - Fitting a gaussian function to the normalised PSD variance/perceived fatigue data

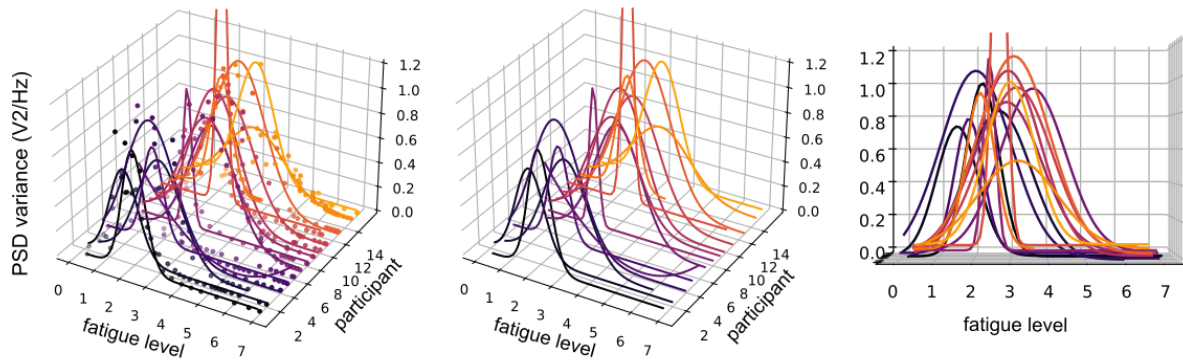

(c) 75% MVC - Fitting a gaussian function to the normalised PSD variance/perceived fatigue data

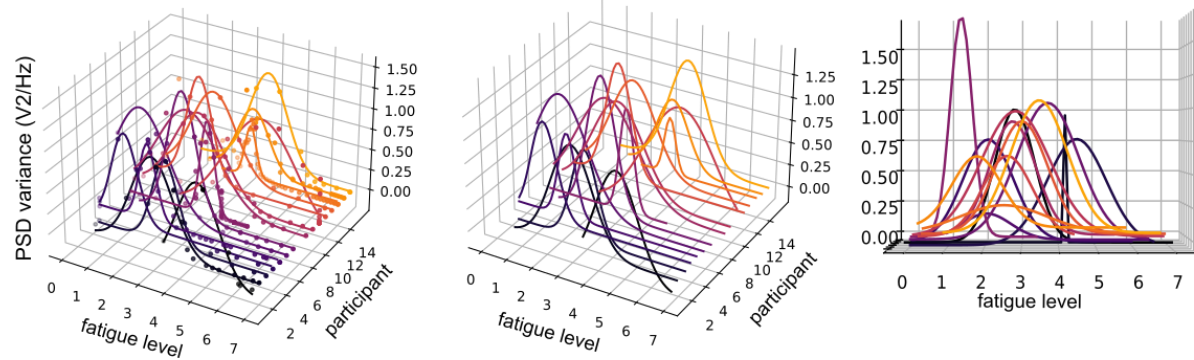

## EMG $S_{var}$ for $\leq 60\text{Hz}$ spectrum (all participants)

(a) 20% MVC - Fitting a gaussian function to the normalised PSD variance/perceived fatigue data

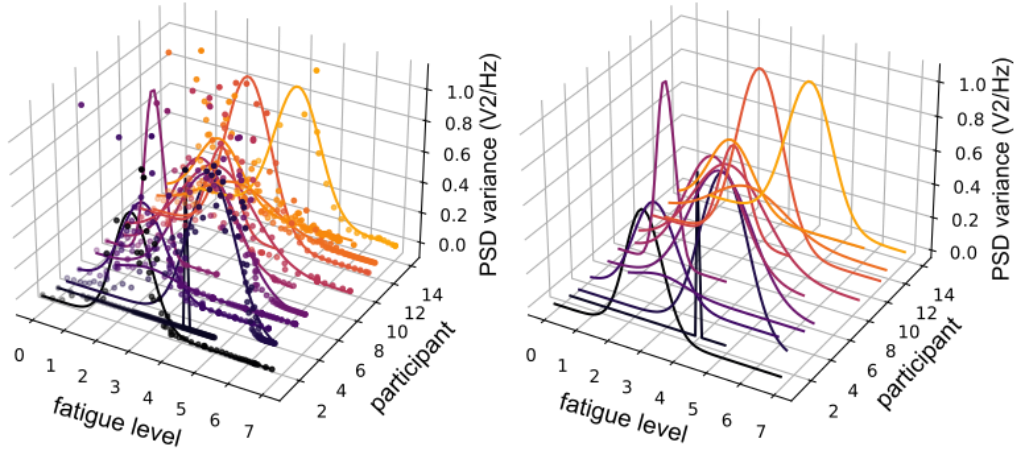

(b) 50% MVC - Fitting a gaussian function to the normalised PSD variance/perceived fatigue data

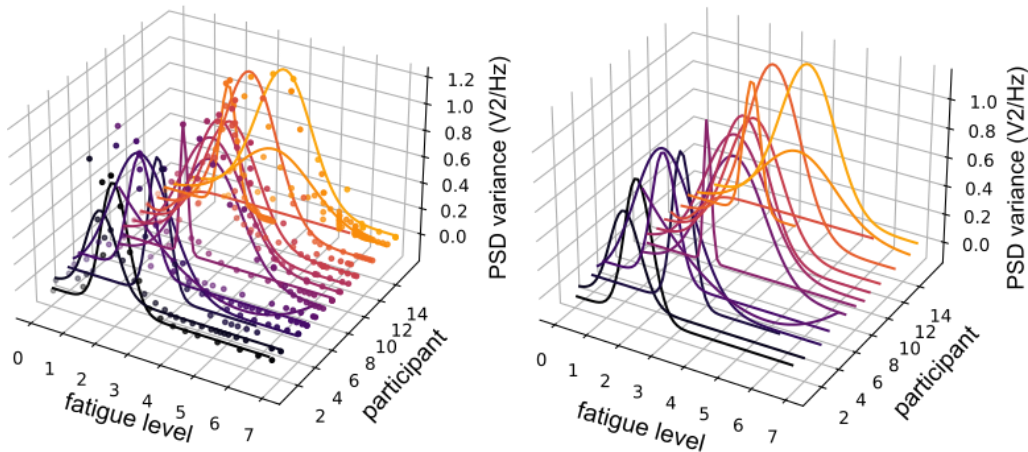

(c) 75% MVC - Fitting a gaussian function to the normalised PSD variance/perceived fatigue data

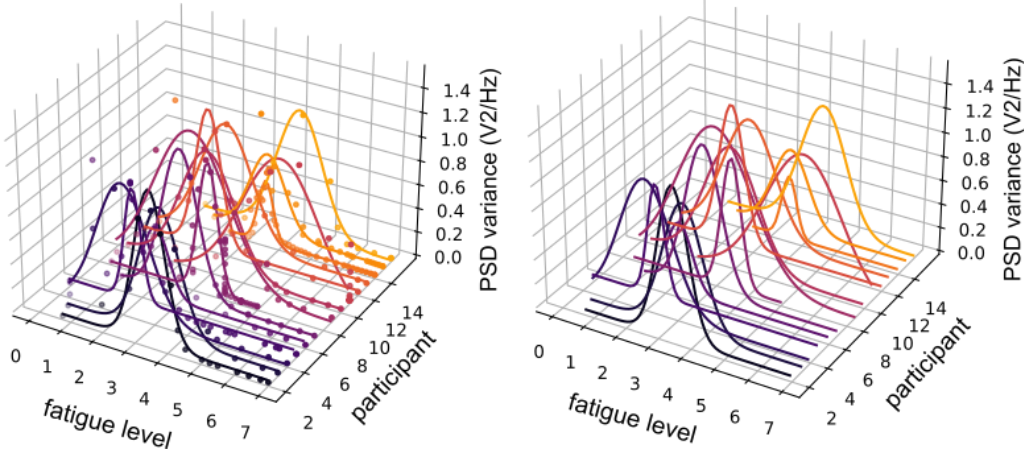

Supplement: Supplementary file 1 [file d54ef822c5a2850612e5bcae.pdf]
